# Supplementary material
Source: PubMed Central journal article supplement (PMC2365467)
Supplement: NIHMS39652-supplement-Supp_Figure_1.pdf [file NIHMS39652-supplement-Supp_Figure_1.pdf]

a) CMS5803 Family

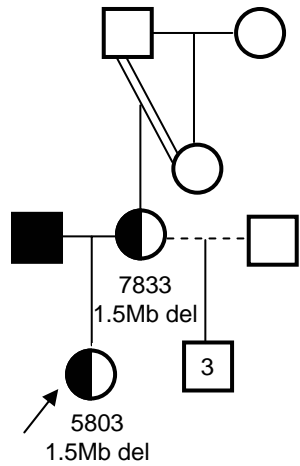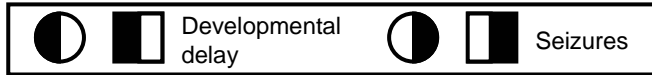

b) CMS7906 Family

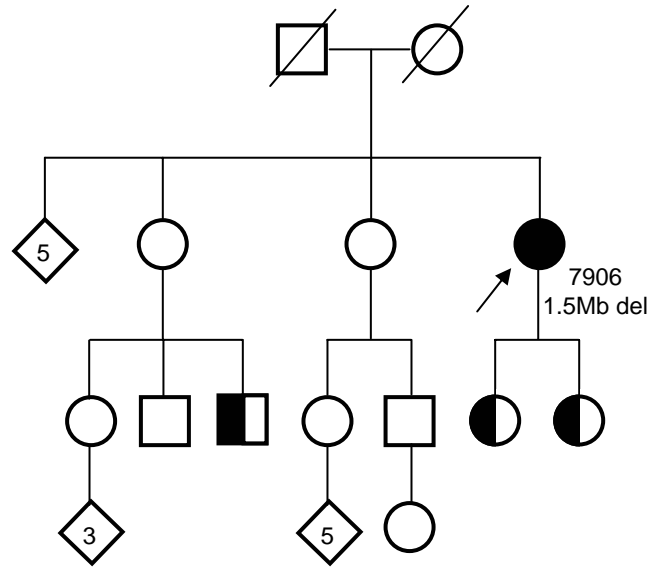

**Supplementary Figure 1.** Pedigrees of 15q13 deletions. **(a)** Pedigree for individuals CMS5803 and CMS7833 who were identified independently by qPCR and subsequently found to be related. **(b)** Pedigree for proband CMS7906.
