# Supplementary material
Source: PubMed Central journal article supplement (PMC2365467)
Supplement: NIHMS39652-supplement-Supp_Figure_5.pdf [file NIHMS39652-supplement-Supp_Figure_5.pdf]

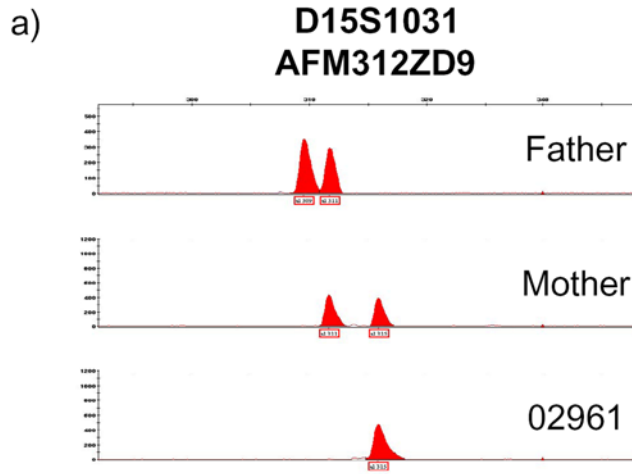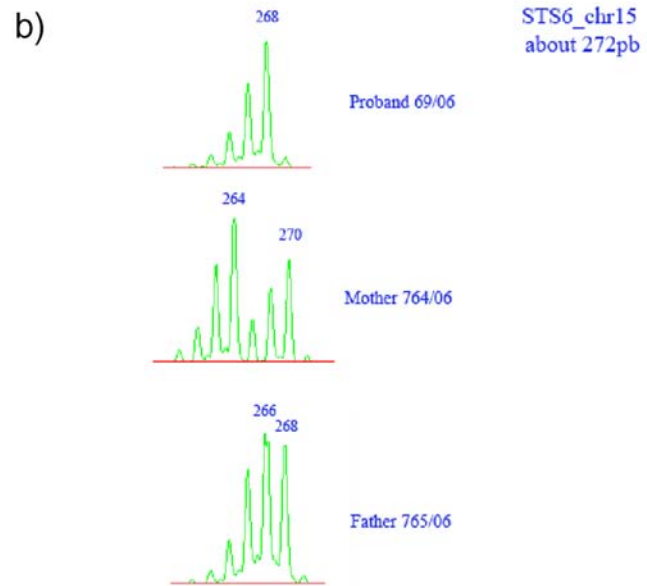

**Supplementary Figure 5.** Microsatellite analysis of two BP4-BP5 deletions of 15q13.3 **(a)** Patient 02961, data from D15S1031 showing the deletion is of paternal origin. **(b)** Patient 69/06, data from STS6 showing the deletion is of maternal origin.
