# Supplementary material
Source: PubMed Central journal article supplement (PMC2365467)
Supplement: NIHMS39652-supplement-Supp_Figure_6.pdf [file NIHMS39652-supplement-Supp_Figure_6.pdf]

## Segmental duplications

IMR338M

69/06

inv dup(15)

inv dup(15)

mar(15)

PWS deletion

Gaps

Genes

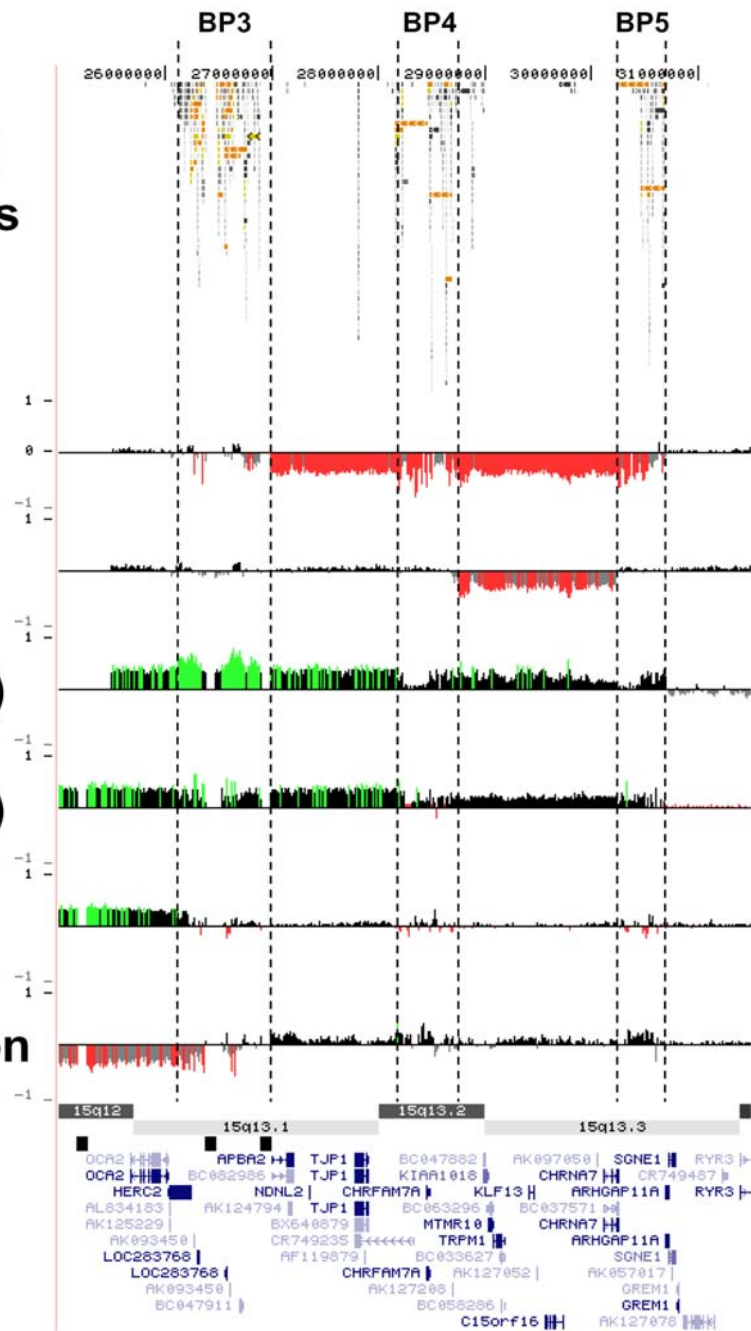

**Supplementary Figure 6.** Breakpoints of multiple different rearrangements of proximal 15q map to large blocks of segmental duplications at BP3, BP4, and BP5. Image shows the deletions identified in IMR338 (BP3-BP5) and 69/06 (BP4-BP5). Results obtained in two unrelated patients with inv dup(15) chromosomes show both are composed of two copies of the region 15cen-BP4 and a single copy of region BP4-BP5. This was subsequently confirmed by FISH (data not shown). We also tested one patient carrying a marker chromosome 15 (four copies of the region 15cen-BP3), and one patient with a class II Prader-Willi deletion (one copy of the region BP2-BP3), providing further evidence of recurrent chromosomal breakpoints in 15q. Image shows a 6.5 Mb region of 15q12-15q13.3 (chr15:25,000,001-31,500,000). For each individual, deviations of probe log<sub>2</sub> ratios from zero are depicted by grey/black bars, with those exceeding a threshold of 1.5 standard deviations from the mean probe ratio colored green and red to represent relative gains and losses, respectively. Tracks above the plot indicate segmental duplications (grey/yellow/orange bars representing duplications with 90-98%/98-99%/99-100% sequence identity, respectively).
